# Supplementary material for: Construction of a novel two-dimensional AgBiO3/BiOBr step-scheme heterojunction for enhanced broad-spectrum photocatalytic performance
Source: Royal Society of Chemistry journal article supplement (doi:10.1039/d2ra03157d), 2022-01-01
Supplement: d2ra03157d1.pdf [file d2ra03157d1.pdf]

## Supplementary material data

### Construction of Novel Two-dimensional AgBiO<sub>3</sub>/BiOBr Step-scheme Heterojunction for Enhanced Broad-spectrum Photocatalytic Performance

Total number of pages of Supporting Information: 8

Number of Figures in Supporting Information: 4

Number of Tables in Supporting Information: 3

#### List of the Supplemental Figures

**Fig. S1.** XRD patterns of as-synthesized samples: (a) BiOBr, (b)AB-5.

**Fig. S2.** The degradation performance of the catalyst without light and with visible light toward CIP.

**Fig. S3.** Photocurrent-time transient of the as-prepared samples.

**Fig. S4.** Photocatalytic reactor

#### List of the Supplemental Table

**Table S1.** Molecular formulas and structures of several organic pollutions studied in this work

**Table S2.** Content of each element on AB-5 surface.

**Table S3.** Comparison with other previously reported photocatalysts in the literature for the photocatalytic of CIP.

Fig. S1.

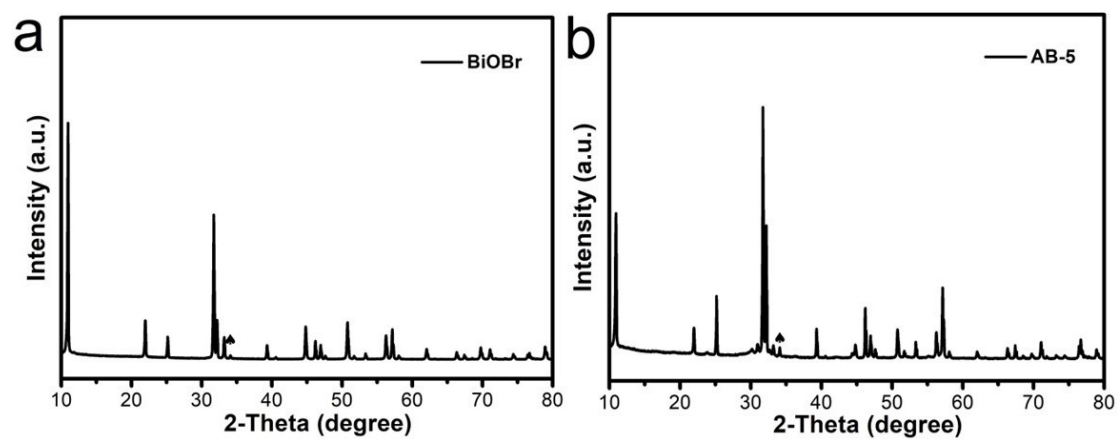

Fig. S1. XRD patterns of as-synthesized samples: (a) BiOBr, (b)AB-5.

Fig. S2.

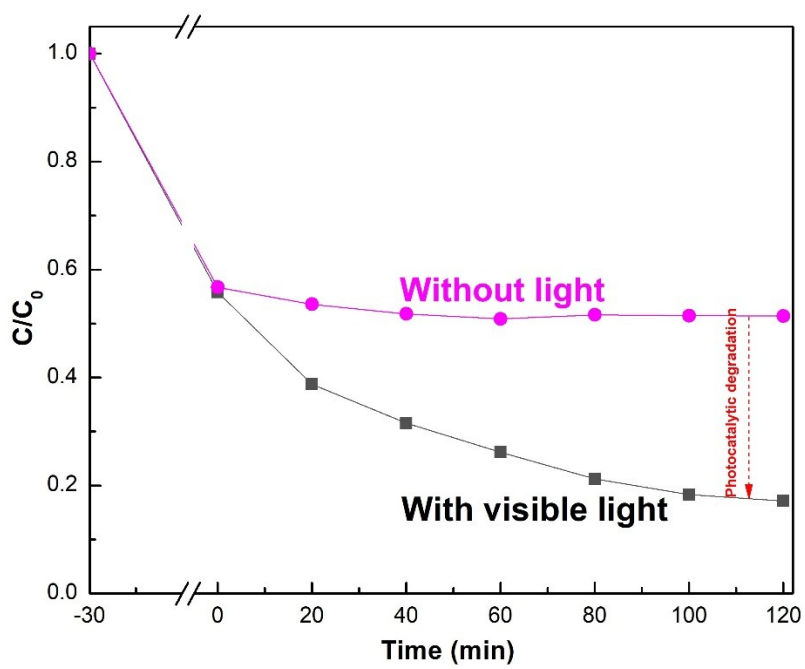

Fig. S2. The degradation performance of the catalyst without light and with visible light toward

CIP.

Fig. S3.

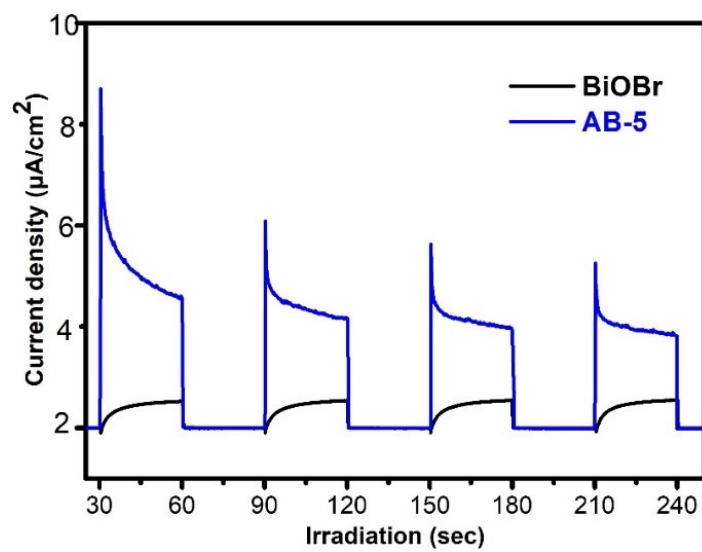

Fig.S3. Photocurrent-time transient of the as-prepared samples.

**Fig. S4**

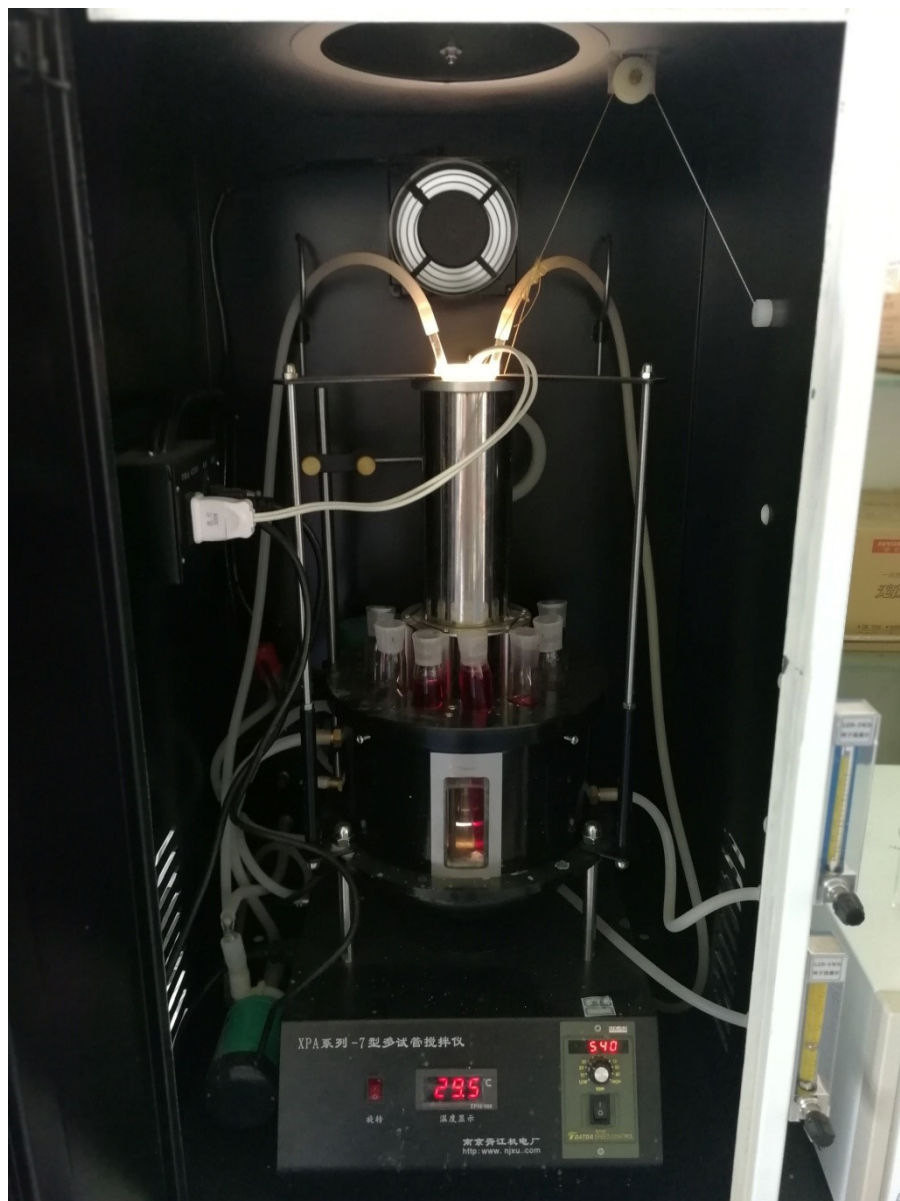

**Fig. S4. Photocatalytic reactor**

**Table S1.** Molecular formulas and structures of several organic pollutions studied in this work

| Organic pollutions    | Molecular formula             | Structure                                                                           | MW    |
|-----------------------|-------------------------------|-------------------------------------------------------------------------------------|-------|
| Ciprofloxacin (CIP)   | $C_{17}H_{18}FN_3O_3$         | 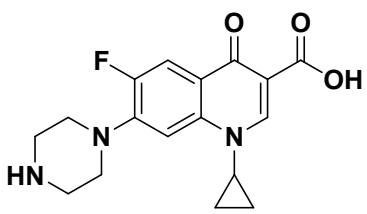  | 331.3 |
| Lanasol Red 5B (LR5B) | $C_{20}H_{15}N_4O_8S_2BrNa_2$ |   | 629.0 |
| Rhodamine B (RhB)     | $C_{28}H_{31}ClN_2O_3$        |  | 479.0 |

**Table S2.** Content of each element on AB-5 surface.

| <b>Elt.</b> | <b>Line</b> | <b>Intensity<br/>(c/s)</b> | <b>Conc.</b> | <b>Units</b> | <b>Error<br/>2-sig</b> |
|-------------|-------------|----------------------------|--------------|--------------|------------------------|
| O           | Ka          | 141.40                     | 7.724        | wt.%         | 0.230                  |
| Br          | Ka          | 1.69                       | 6.674        | wt.%         | 4.606                  |
| Ag          | La          | 50.69                      | 4.659        | wt.%         | 0.309                  |
| Bi          | La          | 9.36                       | 80.943       | wt.%         | 13.489                 |
| Total       |             |                            | 100.000      | Wt.%         |                        |

**Table S3.** Comparison with other previously reported photocatalysts in the literature for the photocatalytic of CIP.

| <b>Photocatalyst</b>                                               | <b>Dosage (g/L)</b> | <b>concentration of CIP(g/L)</b> | <b>Light source</b>   | <b>Time (min)</b> | <b>Removal (min<sup>-1</sup>)</b> | <b>Rate (min<sup>-1</sup>)</b> | <b>Ref</b> |
|--------------------------------------------------------------------|---------------------|----------------------------------|-----------------------|-------------------|-----------------------------------|--------------------------------|------------|
| <b>Bi<sub>2</sub>O<sub>2</sub>CO<sub>3</sub>/BiOBr</b>             | 1g/L                | 10mg/L                           | 500 W XL<br>(λ>400nm) | 240               | 90%                               | 0.01                           | [1]        |
| <b>BiOBr /Bi<sub>2</sub>Ti<sub>2</sub>O<sub>7</sub></b>            | 1g/L                | 10mg/L                           | 800 W XL<br>(λ>420nm) | 120               | >90%                              | 0.02684                        | [2]        |
| <b>BiOBr/Bi<sub>4</sub>O<sub>5</sub>Br<sub>2</sub></b>             | 1g/L                | 10mg/L                           | 500 W XL<br>(λ>420nm) | 150               | 91%                               | 0.015                          | [3]        |
| <b>Bi<sub>2</sub>WO<sub>6</sub>/CuBi<sub>2</sub>O<sub>4</sub></b>  | 1g/L                | 10mg/L                           | 500 W XL<br>(λ>420nm) | 180               | >90%                              | 0.01282                        | [4]        |
| <b>BiOBr/Bi<sub>4</sub>O<sub>5</sub>Br<sub>2</sub>-OV</b>          | 1g/L                | 10mg/L                           | 800W XL<br>(λ>400nm)  | 60                | 94%                               | 0.04159                        | [5]        |
| <b>CuS/BiVO<sub>4</sub></b>                                        | 1g/L                | 10mg/L                           | 300W XL<br>(λ>420nm)  | 90                | 86.7                              | 0.02151                        | [6]        |
| <b>Bi-SnO<sub>2</sub></b>                                          | 1g/L                | 10mg/L                           | 350 W XL              | 90                | 92%                               | -                              | [7]        |
| <b>Bi<sub>2</sub>MoO<sub>6</sub>/CuBi<sub>2</sub>O<sub>4</sub></b> | 1g/L                | 10mg/L                           | 500 W XL<br>(λ>420nm) | 180               | 90.2%                             | 0.01263                        | [8]        |
| <b>AgBiO<sub>3</sub>/BiOBr</b>                                     | 1g/L                | 20mg/L                           | 350 W XL<br>(λ>420nm) | 120               | 83%                               | 0.02151                        | This work  |
